# Supplementary material
Source: MDPI journal article supplement (https://www.mdpi.com/2311-553X/5/1/2)

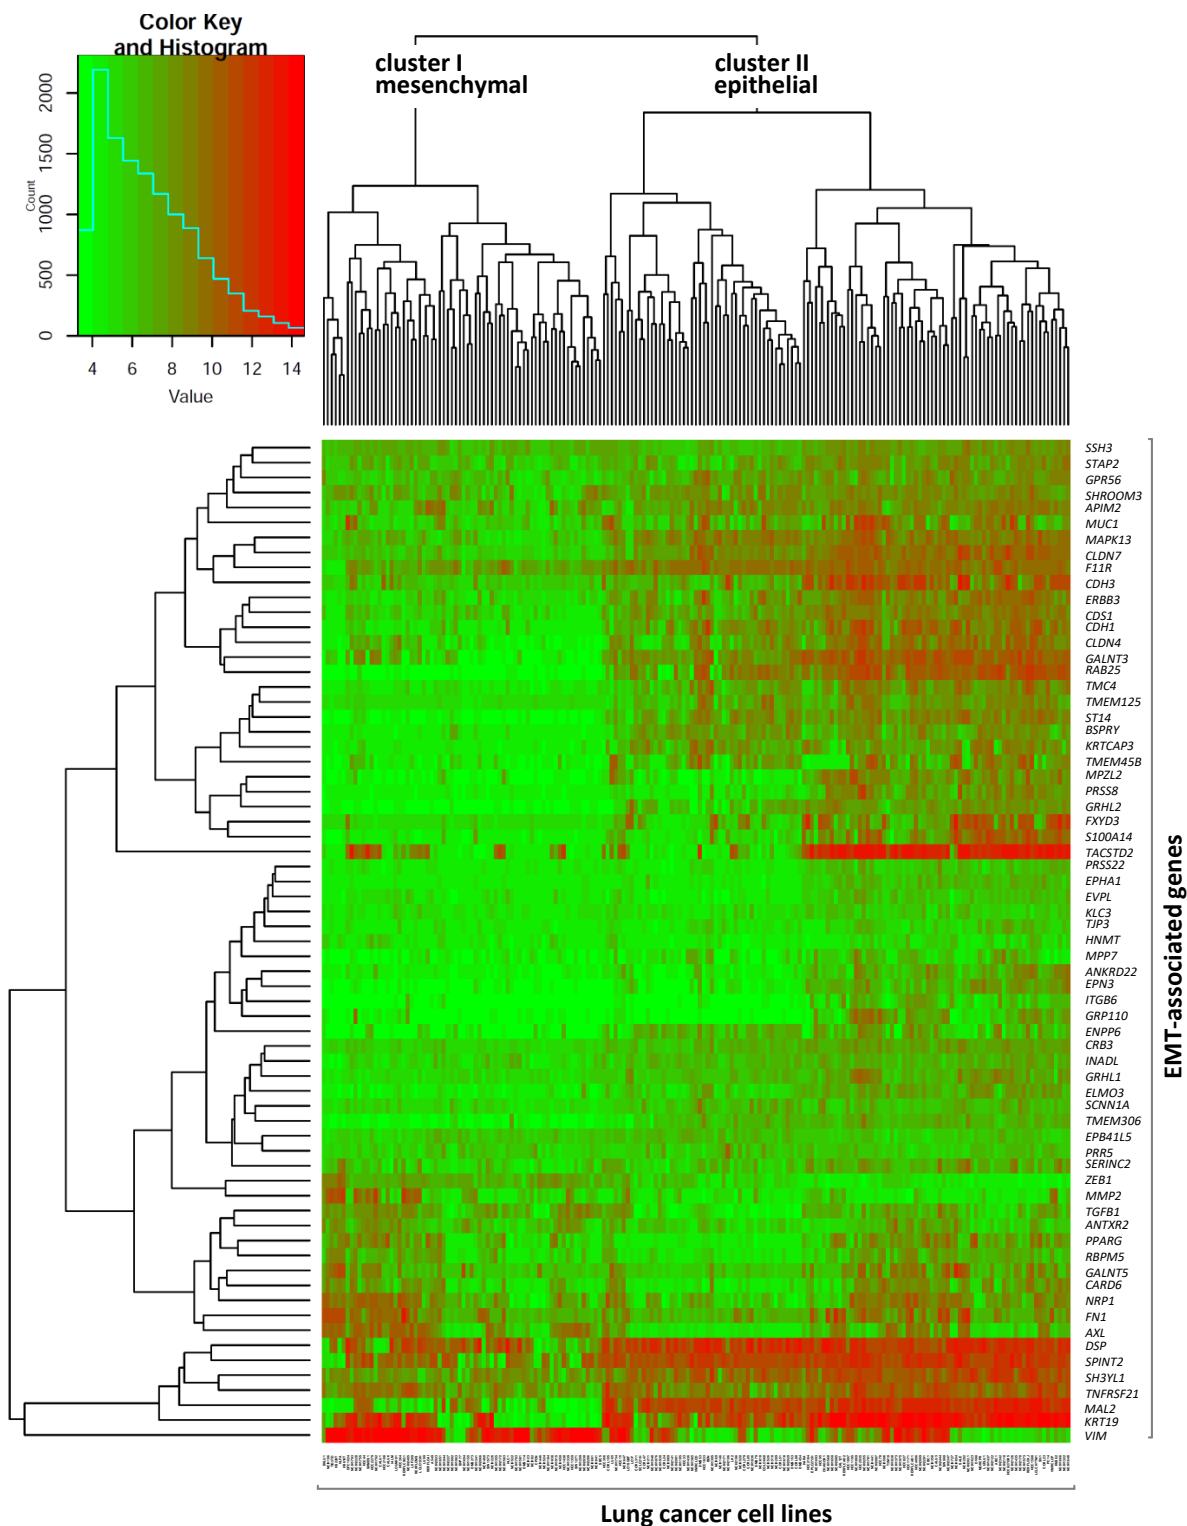

**Figure S2**

Supplement: s1 [file s1]
